# Supplementary material
Source: Springer Nature journal article supplement (https://www.springermedizin.de/resource/supplementary/12936_2008_781_MOESM1_ESM.pdf/9548894)

N

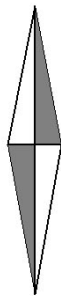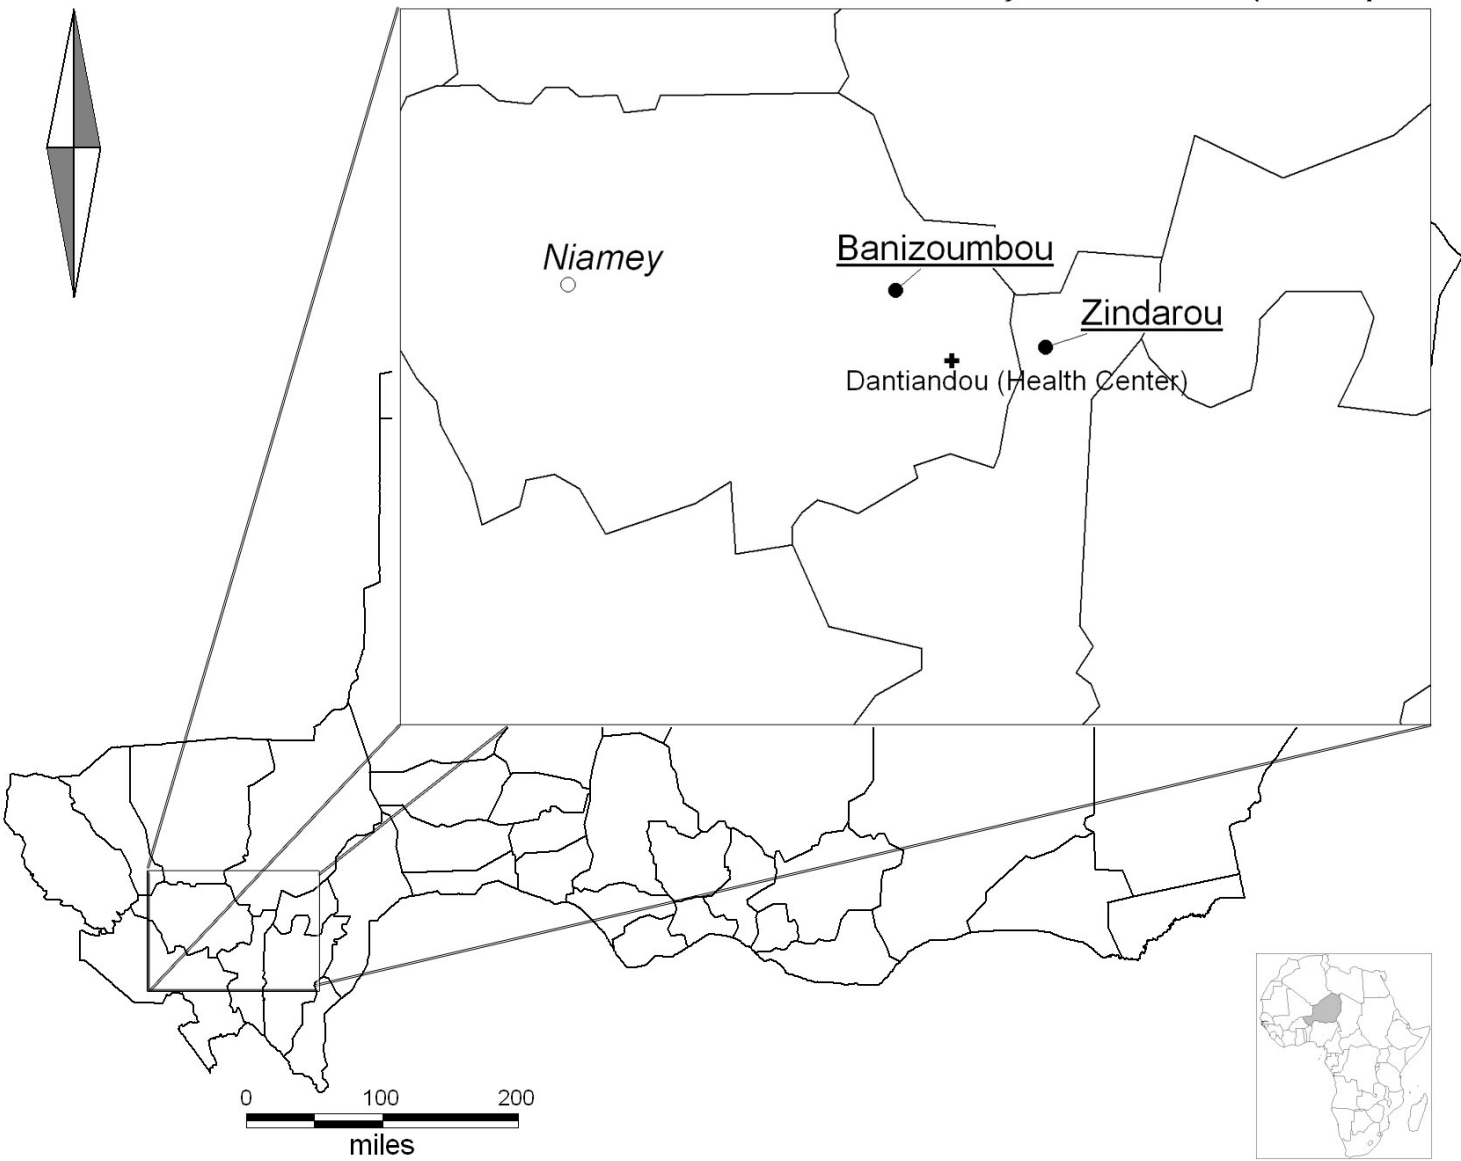

Niamey

Banizoumbou

Zindarou

Dantiandou (Health Center)

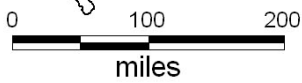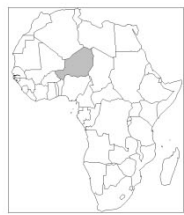

Supplement: MOESM1 [file 9548894]
